# Supplementary material
Source: publisher figshare collection journal article supplement (https://aacr.figshare.com/articles/dataset/_/23391305)
Supplement: Supplementary file 1 [file 41119901]

Figure S4

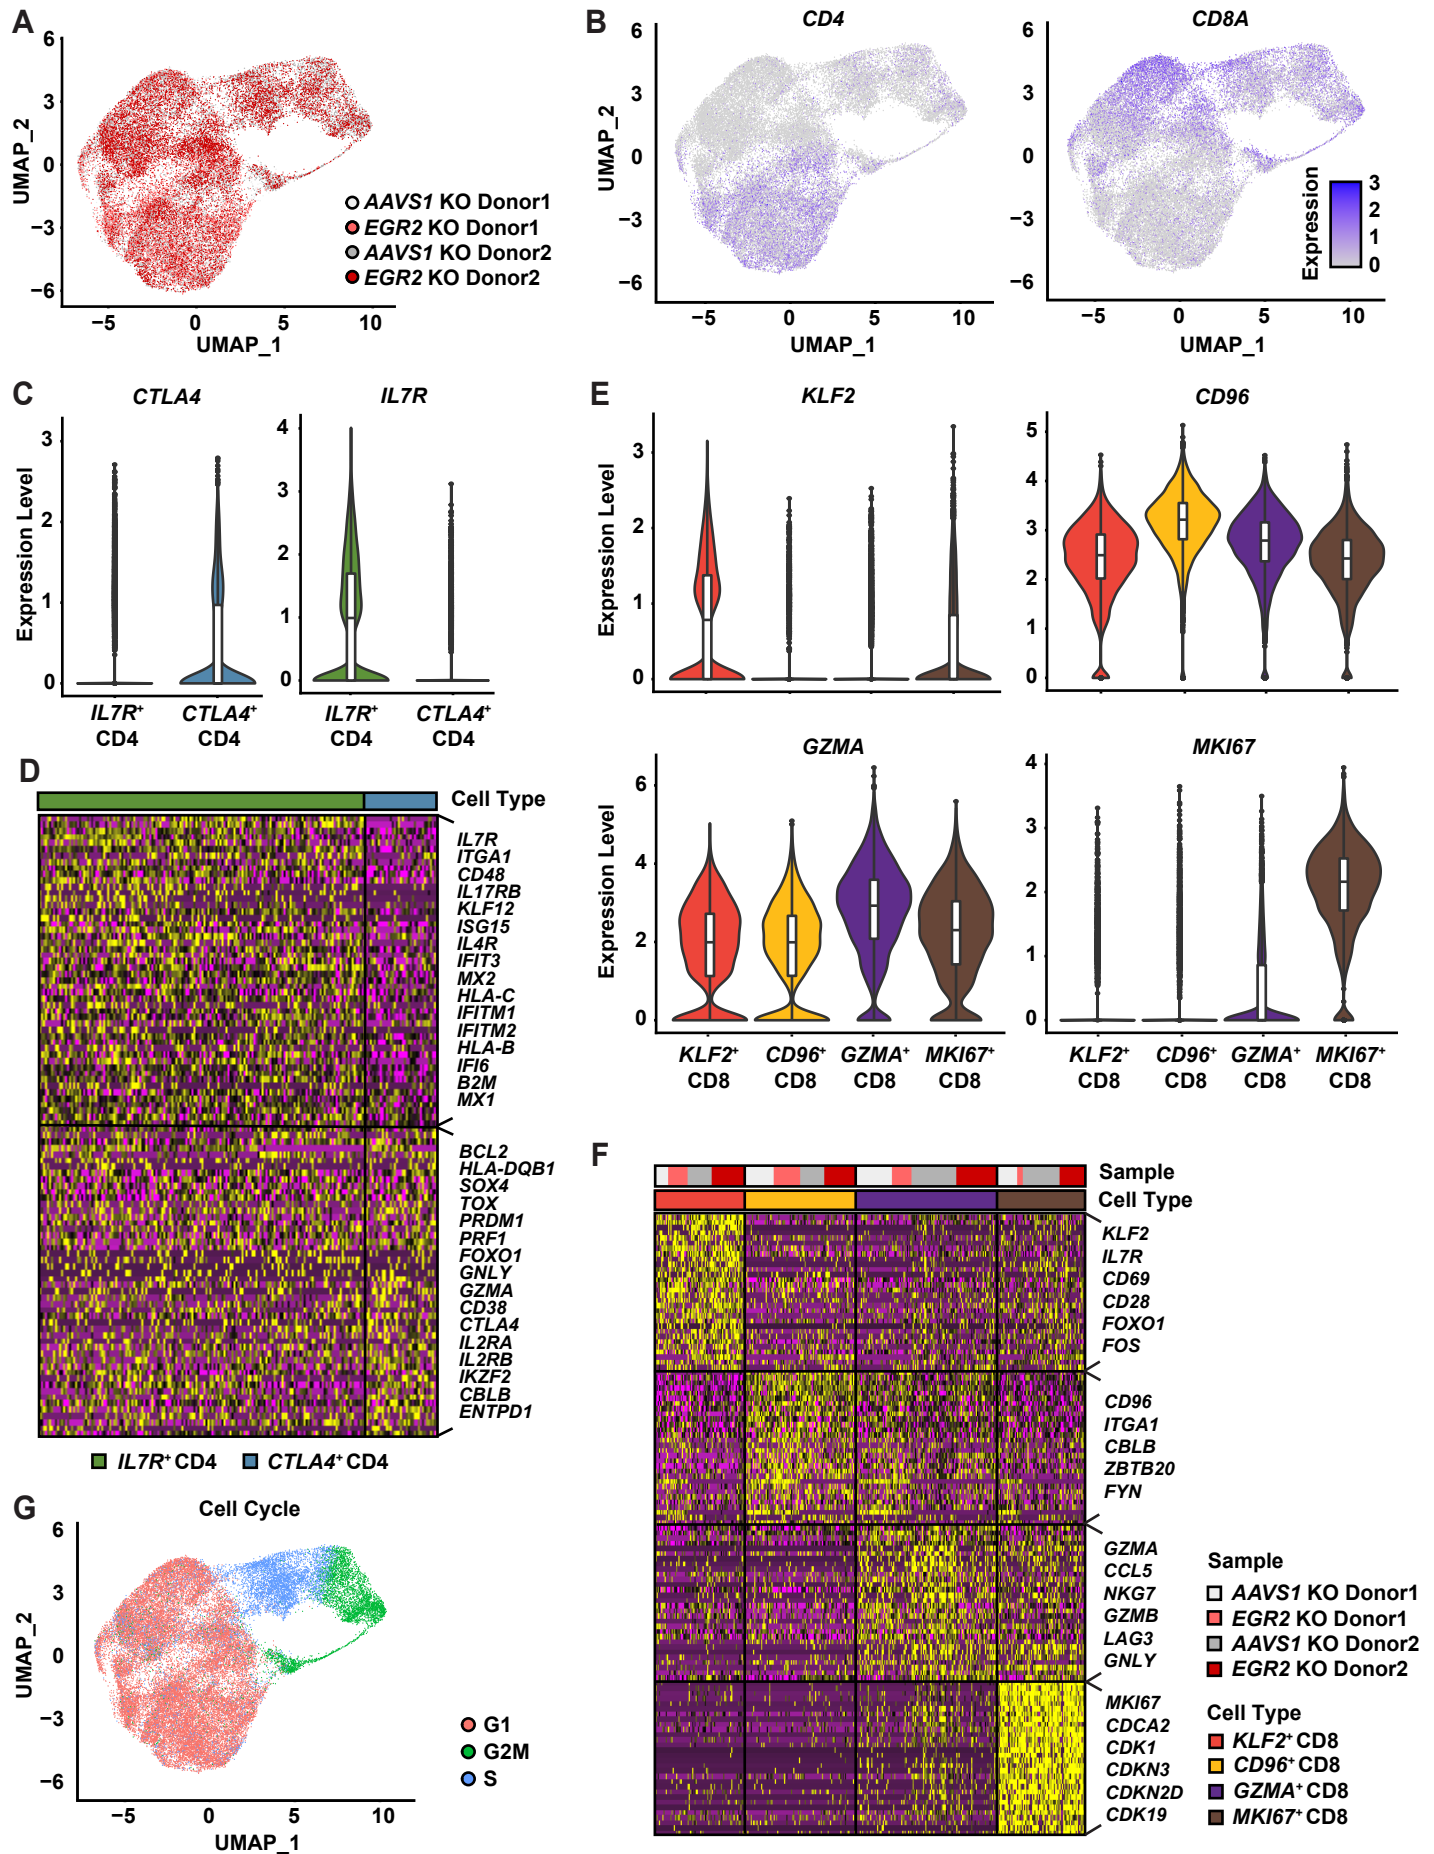

**Supplementary Figure 4. Marker gene expression in CAR T-cell clusters.** **A**, Uniform manifold approximation and projection (UMAP) plot of *AAVS1* and *EGR2* knockout (KO) CAR T-cell samples is shown. **B**, UMAP plots showing expression levels of CD4 and CD8. **C**, Violin plot depicting expression of cluster-defining markers in CD4<sup>+</sup> T-cells. **D**, Differentially expressed genes in *IL7R*<sup>+</sup> versus *CTLA4*<sup>+</sup> CD4<sup>+</sup> T-cells. **E**, Violin plots showing expression levels of cluster-defining markers in CD8<sup>+</sup> T-cells. **F**, Heatmap displaying differentially expressed genes between CD8<sup>+</sup> cell clusters. **G**, Cell cycle scores mapped on UMAP plots.
